# Supplementary material for: Sb–TiO2/C nanofiber paper as a flexible high-performance anode for lithium-ion and sodium-ion batteries
Source: Royal Society of Chemistry journal article supplement (doi:10.1039/d6ra02199a), 2026-05-05
Supplement: d6ra02199a1.pdf [file d6ra02199a1.pdf]

## Supporting Information

### Sb-TiO<sub>2</sub>/C composite nanofibers paper as high-performance anode materials for Lithium and Sodium Ion Batteries

#### Table of contents

|                                                                                                                                                                                                                                      |   |
|--------------------------------------------------------------------------------------------------------------------------------------------------------------------------------------------------------------------------------------|---|
| Fig.S1. Optical photographs of (a) precursor (b) stabilized and (c) carbonized nanofiber membrane (1ml TTIP and 0.2 g SbCl <sub>3</sub> .....                                                                                        | 2 |
| Fig. S2. The SEM image of Sb-TiO <sub>2</sub> /C (0.4 g SbCl <sub>3</sub> ) nanofibers, showing plenty of aggregative plots.....                                                                                                     | 2 |
| Fig. S3 Digital photographs of the as-prepared folded and unfolded Sb-TiO <sub>2</sub> /C nanofiber paper: (a) the paper after multiple folding; (b) the paper after unfolding, showing its intact structure. ....                   | 3 |
| Fig. S4. Raman Fitting curves of TiO <sub>2</sub> /C NFs (a)and TiO <sub>2</sub> -Sb/C NFs(b) .....                                                                                                                                  | 3 |
| Fig. S5 Raman spectra (0–2000 cm <sup>-1</sup> ) of TiO <sub>2</sub> /C and Sb-TiO <sub>2</sub> /C NFs including the fingerprint region below 1000 cm <sup>-1</sup> . .....                                                          | 4 |
| Fig. S6. N <sub>2</sub> adsorption-desorption isotherm (insets) and BJH Pore size distribution curve of (a) TiO <sub>2</sub> /C NFs, (b) Sb(0.2)-TiO <sub>2</sub> /C NFs and Sb(0.4)-TiO <sub>2</sub> /C NFs.....                    | 4 |
| Fig. S7. Electrochemical impedance spectroscopy (EIS) Nyquist plot of the TiO <sub>2</sub> /C nanofiber NFs electrode at 50 mA·g <sup>-1</sup> after the first cycle in LIBs (the inset part is the equivalent circuit model). ..... | 5 |
| Fig. S8. TEM images of TiO <sub>2</sub> /C NFs and Sb-TiO <sub>2</sub> /C NFs .....                                                                                                                                                  | 6 |
| Fig. S9. SEM images After long-term cycling .....                                                                                                                                                                                    | 6 |
| Fig. S10. Rate performance and cycling performance of TiO <sub>2</sub> /C with different addition amounts of Sb.....                                                                                                                 | 7 |
| Table S1. Analysis of the content of Sb and Ti in Sb-TiO <sub>2</sub> /C NFs by ICP-OES .....                                                                                                                                        | 8 |

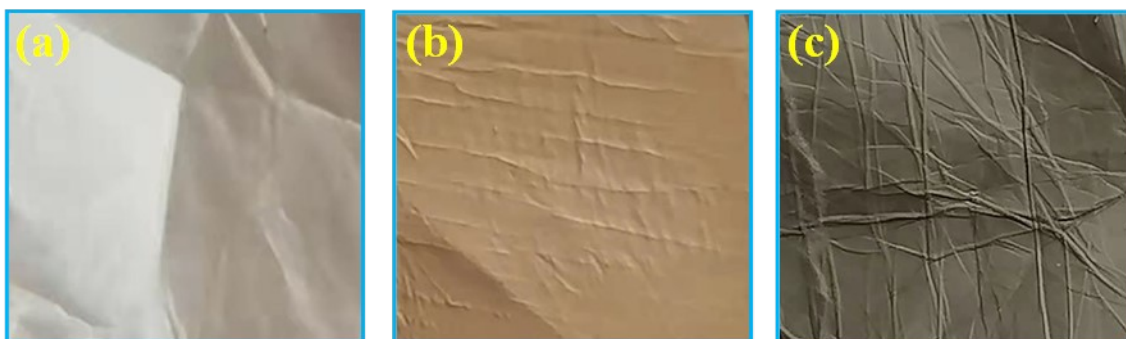

**Fig.S1.** Optical photographs of (a) precursor (b) stabilized and (c) carbonized nanofiber membrane (1ml TTIP and 0.2 g  $\text{SbCl}_3$ )

**Fig. S2.** The SEM image of  $\text{Sb-TiO}_2/\text{C}$  (0.4 g  $\text{SbCl}_3$ ) nanofibers, showing plenty of aggregative plots

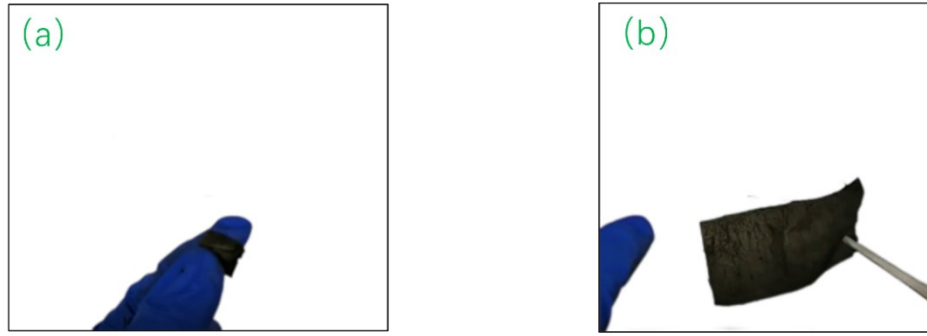

**Fig. S3** Digital photographs of the as-prepared folded and unfolded Sb-TiO<sub>2</sub>/C nanofiber paper: (a) the paper after multiple folding; (b) the paper after unfolding, showing its intact structure.

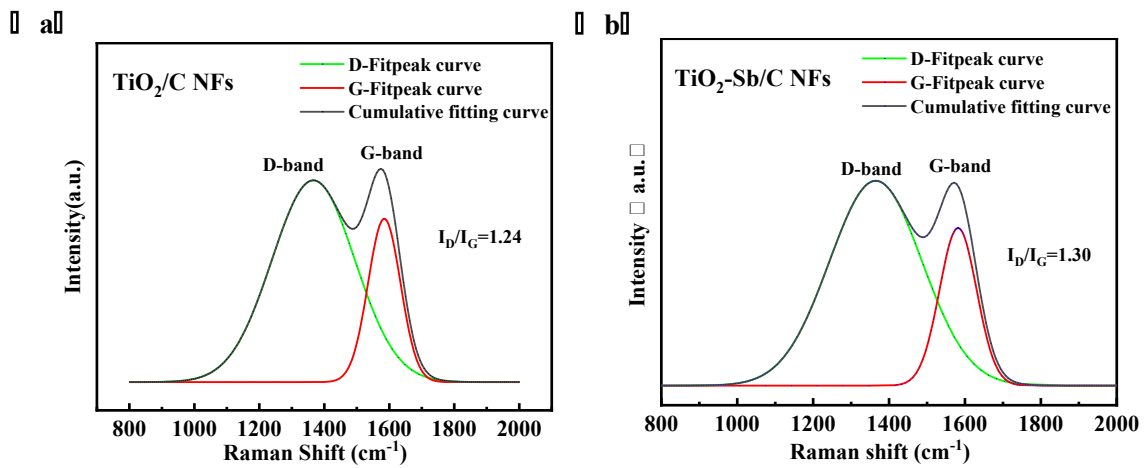

**Fig. S4.** Raman Fitting curves of TiO<sub>2</sub>/C NFs (a) and TiO<sub>2</sub>-Sb/C NFs (b)

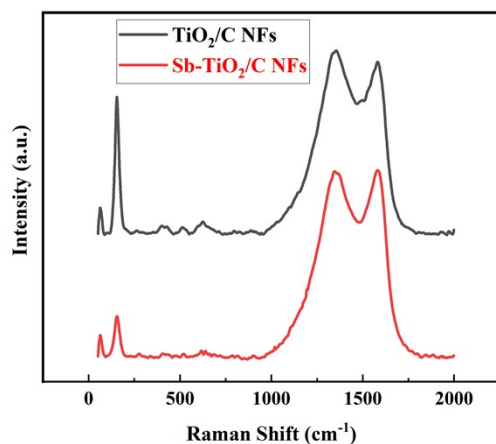

**Fig. S5** Raman spectra (0–2000  $\text{cm}^{-1}$ ) of  $\text{TiO}_2/\text{C}$  and  $\text{Sb-TiO}_2/\text{C}$  NFs including the fingerprint region below 1000  $\text{cm}^{-1}$ .

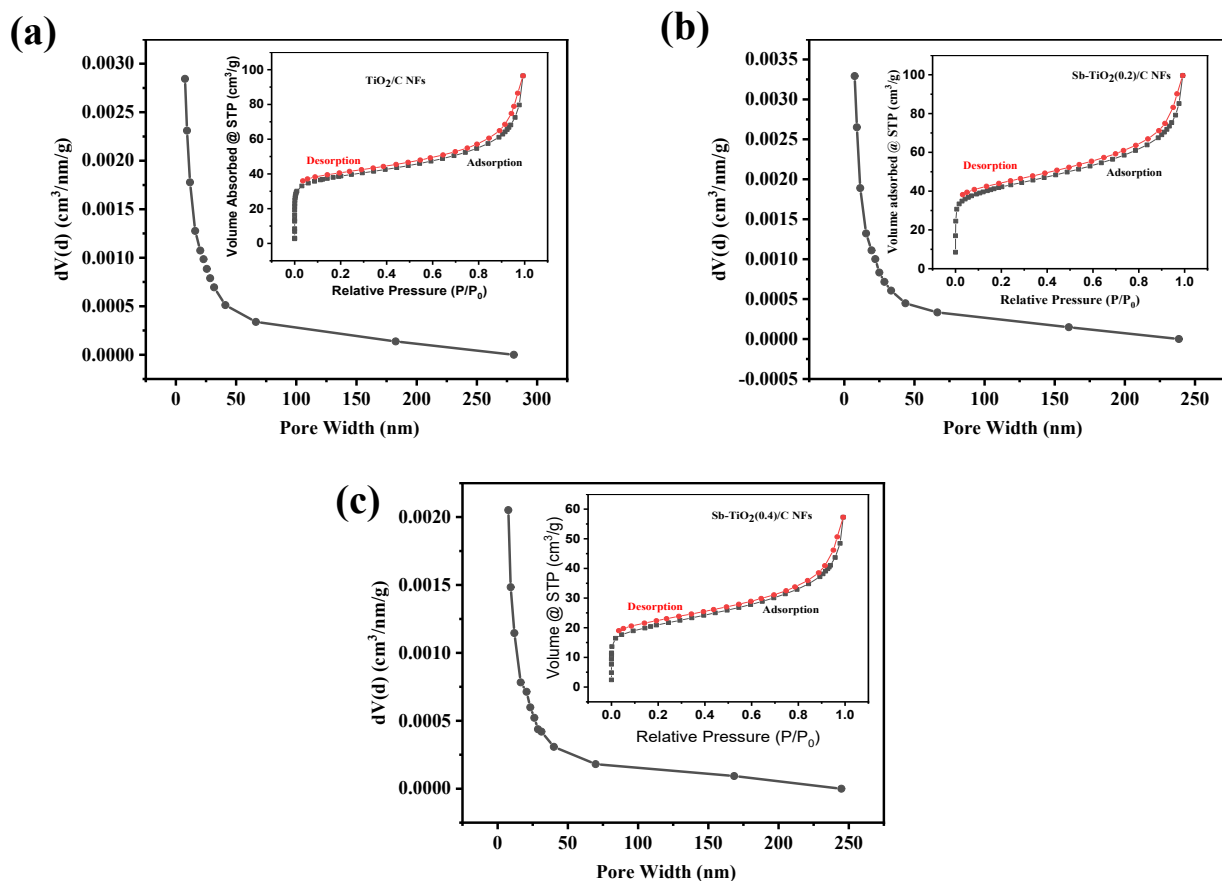

**Fig. S6.**  $\text{N}_2$  adsorption-desorption isotherm (insets) and BJH Pore size distribution curve of (a)  $\text{TiO}_2/\text{C}$  NFs, (b)  $\text{Sb}(0.2)\text{-TiO}_2/\text{C}$  NFs and  $\text{Sb}(0.4)\text{-TiO}_2/\text{C}$  NFs

**Fig. S7.** EDS elemental mapping of the Sb-TiO<sub>2</sub>/C nanofibers. (a) SEM image (electron image) of a representative nanofiber junction. Corresponding elemental distribution maps for (b) C k  $\alpha$  1, (c) Ti K  $\alpha$  1, and (d) O K  $\alpha$  1. The uniform distribution of the weak but detectable Sb signal (highlighted in orange) across the TiO<sub>2</sub> and carbon matrix confirms the homogeneous incorporation of Sb dopants at the micro-scale. The low intensity of the Sb signal is consistent with its designed low doping concentration, as further definitively confirmed by the surface-sensitive XPS analysis in Fig. 4b of the main text.

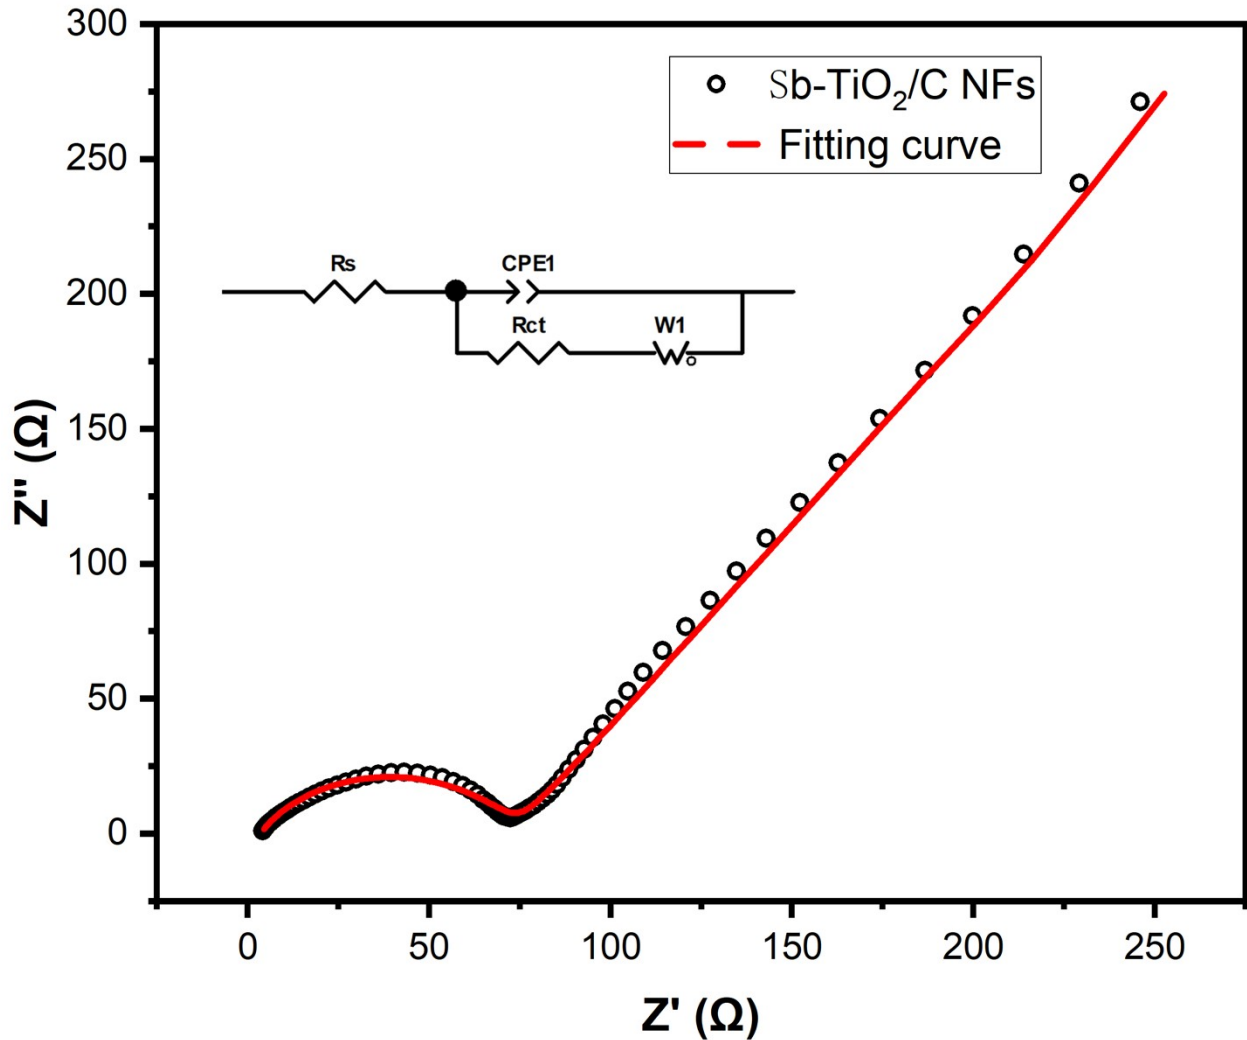

**Fig. S8.** Electrochemical impedance spectroscopy (EIS) Nyquist plot of the TiO<sub>2</sub>/C nanofiber NFs electrode at 50 mA·g<sup>-1</sup> after the first cycle in LIBs (the inset part is the equivalent circuit model).

**Fig. S9.** Rate performance and cycling performance of  $\text{TiO}_2/\text{C}$  with different addition amounts of Sb

(a) Rate performance at various current densities from  $50\text{mA}\cdot\text{g}^{-1}$  to  $2000\text{mA}\cdot\text{g}^{-1}$  in LIBs. (b) Cycling performance at a current density of  $50\text{mA}\cdot\text{g}^{-1}$  in LIBs. (c) Rate performance at various current densities from  $50\text{mA}\cdot\text{g}^{-1}$  to  $2000\text{mA}\cdot\text{g}^{-1}$  in SIBs. (d) Cycling performance at a current density of  $50\text{mA}\cdot\text{g}^{-1}$  in SIBs.

**Note:** The addition amount of Sb is 0g, 0.2g, 0.4g for  $\text{TiO}_2/\text{C}$  NFs, Sb2- $\text{TiO}_2/\text{C}$  NFs, Sb4- $\text{TiO}_2/\text{C}$  NFs, respectively.

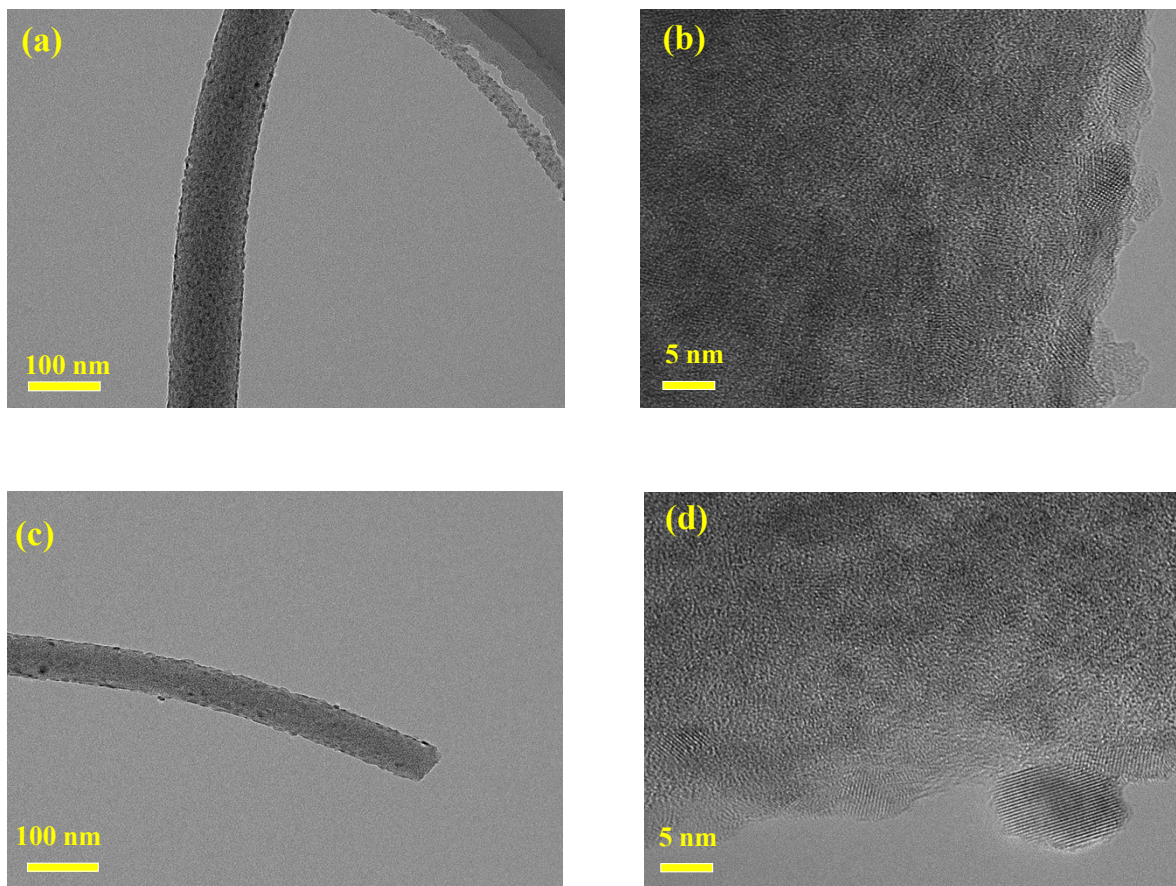

**Fig. S10.** TEM images of  $\text{TiO}_2/\text{C}$  NFs and  $\text{Sb-TiO}_2/\text{C}$  NFs

**Fig. S11.** SEM images After long-term cycling

**Table S1.** Analysis of the content of Sb and Ti in  $\text{Sb-TiO}_2/\text{C}$  NFs by ICP-OES

| $\text{Sb-TiO}_2/\text{C}$ NFs | Sample1       | Sample2       | Average content<br>W(%) |
|--------------------------------|---------------|---------------|-------------------------|
| <b>Sb</b>                      | <b>7.59%</b>  | <b>7.69%</b>  | <b>7.64 wt%</b>         |
| <b>Ti</b>                      | <b>25.71%</b> | <b>25.85%</b> | <b>25.78 wt%</b>        |
